# Supplementary material for: Everolimus and plicamycin specifically target chemoresistant colorectal cancer cells of the CMS4 subtype
Source: PubMed Central journal article supplement (PMC8531384; doi:10.1038/s41419-021-04270-x), 2021-10-21
Supplement: 41419_2021_4270_MOESM6_ESM.pdf [file 41419_2021_4270_MOESM6_ESM.pdf]

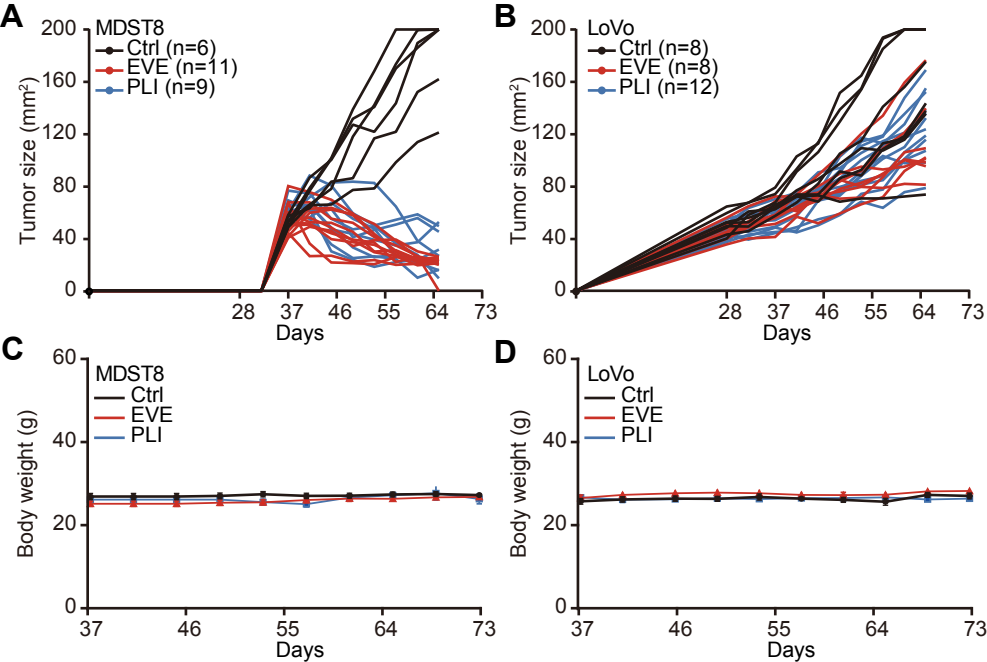

**Figure S5**
